# Supplementary material for: Preparation of polypyrrole composite solid-phase microextraction fiber coatings by sol–gel technique for the trace analysis of polar biological volatile organic compounds
Source: Royal Society of Chemistry journal article supplement (doi:10.1039/c2an36231g), 2012-12-03
Supplement: c2an36231g.pdf [file c2an36231g.pdf]

## Supplementary Material

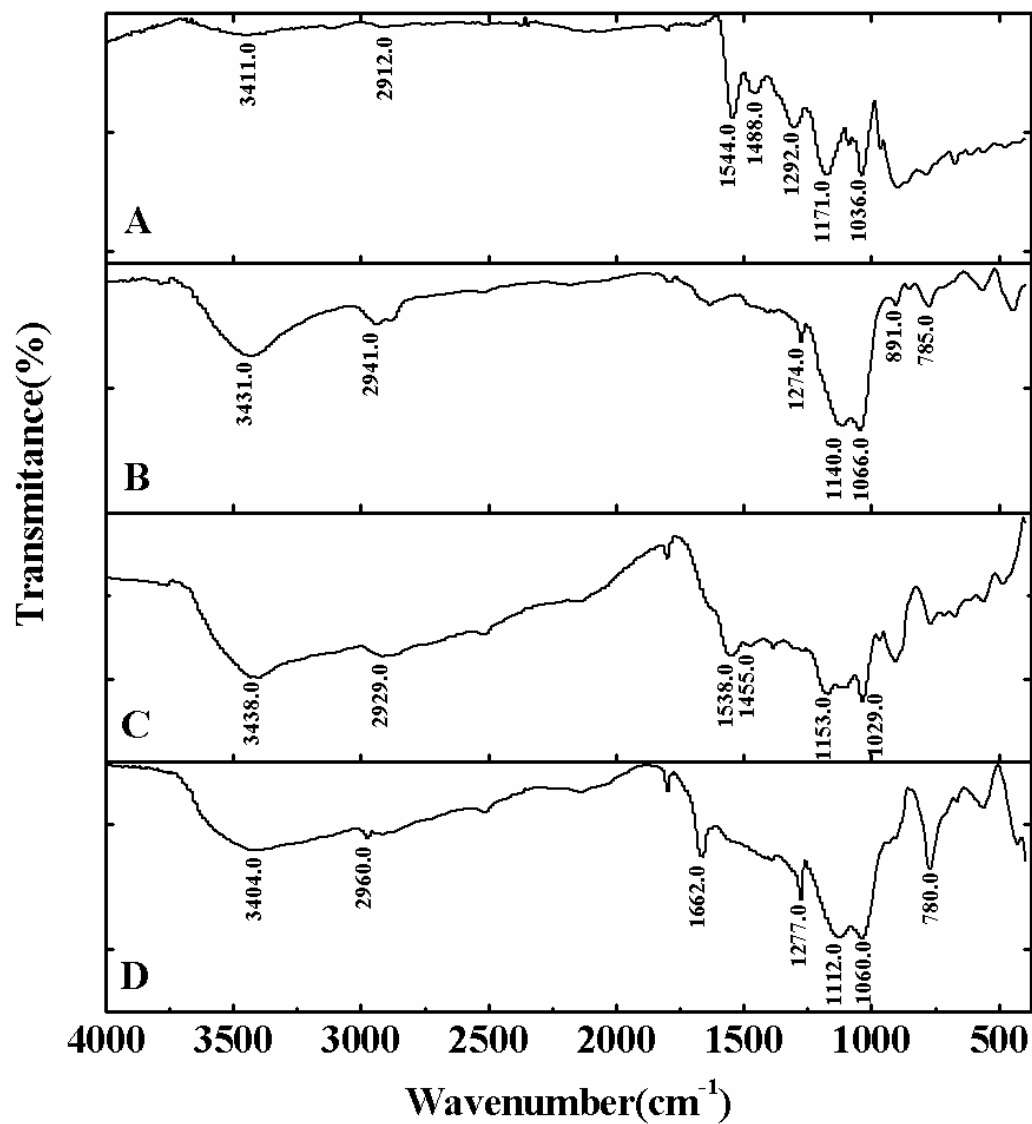

**Fig. 1s** Fourier IR absorption spectra of PPy/ $\beta$ -NSA (A: before sol-gel reaction, B: after sol-gel reaction) and PPy/GR (C: before sol-gel reaction, D: after sol-gel reaction) SPME fiber coating

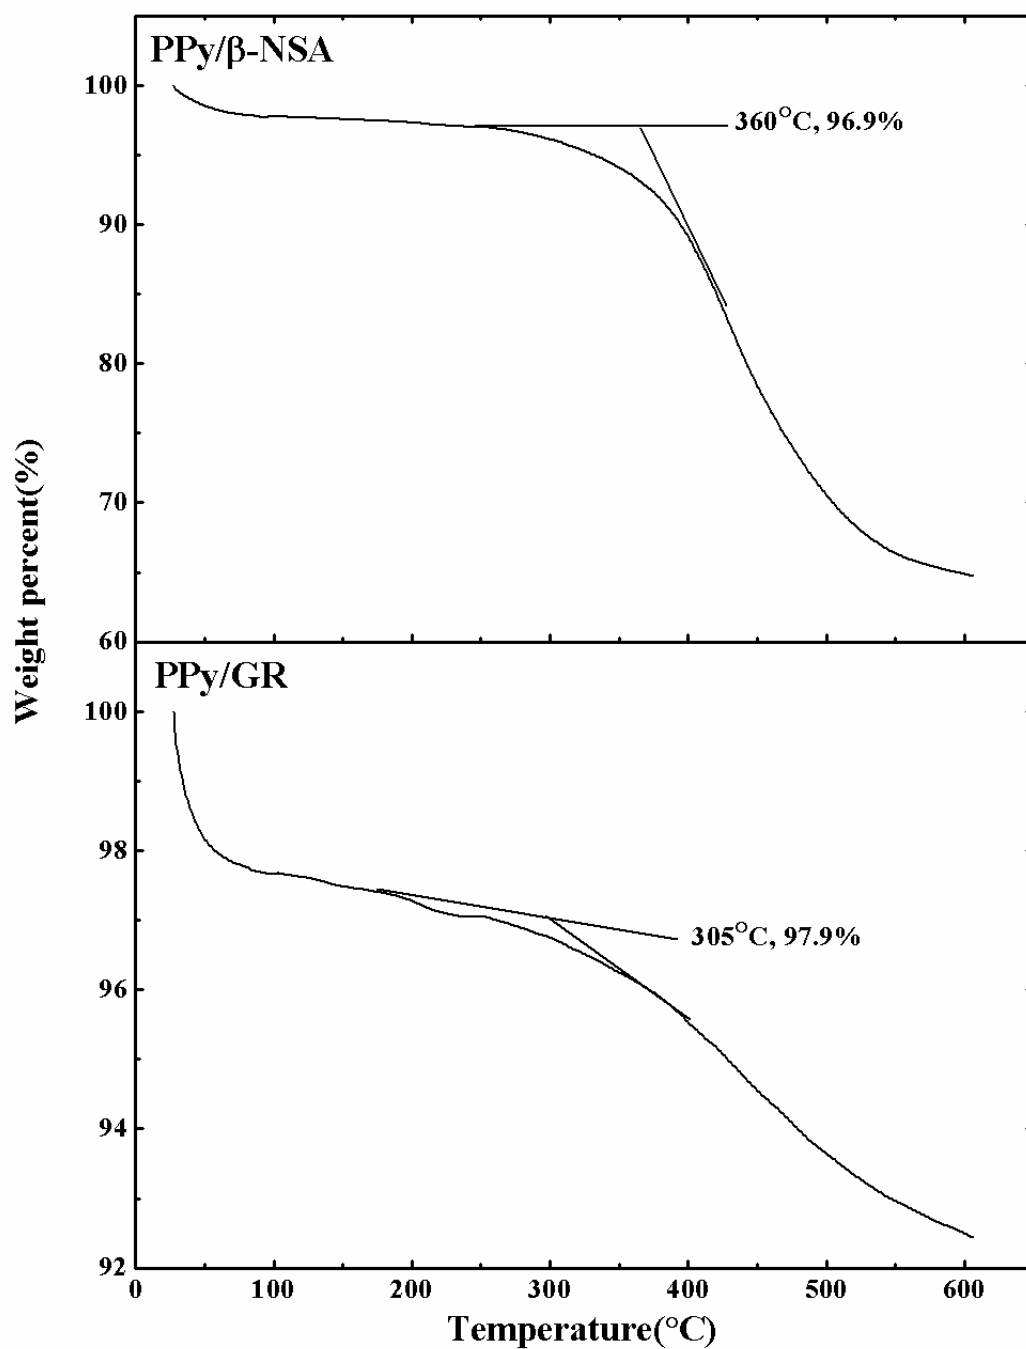

9

10 **Fig. 2s** Thermogravimetric analysis curves for PPy/β-NSA and PPy/GR SPME fiber

11 coating
